# Supplementary material
Source: PubMed Central journal article supplement (PMC8504858)
Supplement: sj-pdf-1-jdr-10.1177_00220345211010436.pdf [file sj-pdf-1-jdr-10.1177_00220345211010436.pdf]

## Inductive materials for regenerative engineering

Fatemeh S. Hosseini<sup>a,b,c,d</sup>, Lakshmi S. Nair, PhD<sup>a,b,c,e,f</sup>, and Cato T. Laurencin, PhD, MD<sup>a,b,c,e,f,g\*</sup>

### Supplementary Data:

#### Supplementary Figure S1.

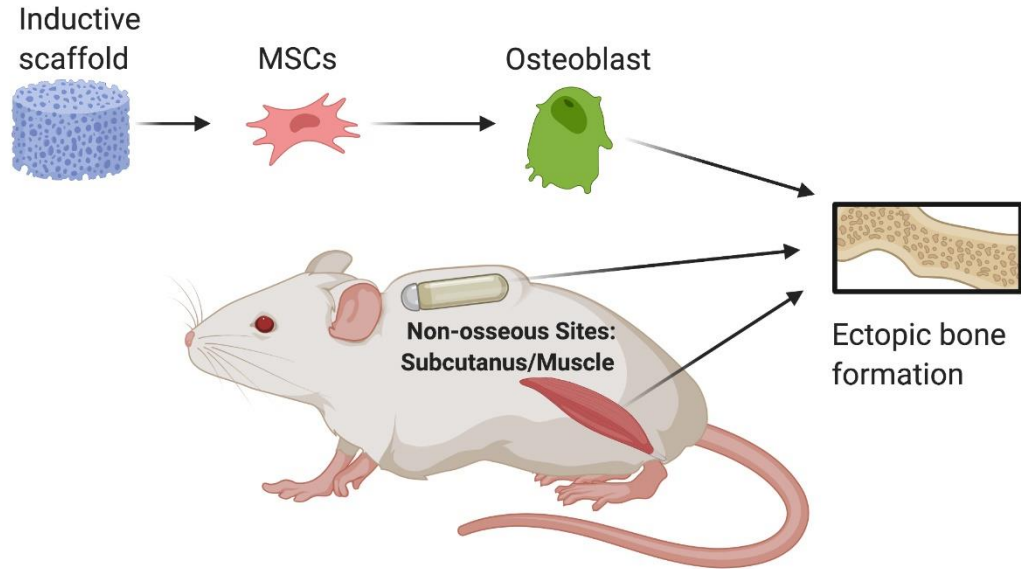

**Supplementary Figure S1.** Osteoinductive materials implantation in non-osseous sites (e.g., intramuscularly or subcutaneously) stimulates osteoblastic differentiation of MSCs and ectopic bone formation.

#### **Supplementary Table S1.** Ca/P based ceramic ratios and aqueous solubility.

| Ca-P Based Ceramics | Chemical formula                             | Ca/P ratio | Solubility ( $K_{sp}$ ) | Temperature ( $^{\circ}\text{C}$ ) | Refs.   |
|---------------------|----------------------------------------------|------------|-------------------------|------------------------------------|---------|
| HA                  | $\text{Ca}_{10}(\text{PO}_4)_6(\text{OH})_2$ | 1.67       | $6.6210^{-126}$         | 25 $^{\circ}\text{C}$              | [32,58] |
| $\beta$ -TCP        | $\text{Ca}_3(\text{PO}_4)_2$                 | 1.5        | $8.6410^{-32}$          | 25 $^{\circ}\text{C}$              | [41,58] |
| $\alpha$ -TCP       | $\text{Ca}_3(\text{PO}_4)_2$                 | 1.5        | $2.0710^{-33}$          | 25 $^{\circ}\text{C}$              | [41,58] |
